# 1 **Mobile Phone Based Strategies for Preconception Education** 2 **in Rural Africa**

3  
4 Zemenu Yohannes Kassa <sup>1\*</sup>, Zelalem Tenaw<sup>1</sup>, Ayalew Astatkie<sup>2</sup>, Melese Siyoum<sup>1</sup>, Gezahegn  
5 Bekele<sup>1</sup>, Kefyalew Taye<sup>3</sup>, Shewangizaw Mekonnen<sup>1</sup>, Zerai Kassaye<sup>3</sup>

6 <sup>1</sup> School of Nursing and Midwifery, College of Medicine and Health Sciences, Hawassa  
7 University, Hawassa, Ethiopia

8 <sup>2</sup> School of Public Health, College of Medicine and Health Sciences, Hawassa University,  
9 Hawassa, Ethiopia

10 <sup>3</sup> School of Medicine, College of Medicine and Health Sciences, Hawassa University, Hawassa,  
11 Ethiopia

12 \* Corresponding author ([zemenu2013@gmail.com](mailto:zemenu2013@gmail.com))

13 Email addresses:

14 **ZY:**[Zemenu2013@gmail.com](mailto:Zemenu2013@gmail.com)

15 **ZT:**[abigiatenaw@gmail.com](mailto:abigiatenaw@gmail.com)

16 **AA:**[ayalewastatkie@gmail.com](mailto:ayalewastatkie@gmail.com)

17 **MS:**[melessiyoum755@gmail.com](mailto:melessiyoum755@gmail.com)

18 **GB:**[bekeledadi@gmail.com](mailto:bekeledadi@gmail.com)

19 **KT:**[gkefyalew@yahoo.com](mailto:gkefyalew@yahoo.com)

20 **SM:**[mkshawa@gmail.com](mailto:mkshawa@gmail.com)

21 **ZK:**[ztarrekegn@gmail.com](mailto:ztarrekegn@gmail.com)

22

23

24

25

26

## 27 **Abstract**

28 **Background:** prepregnancy health care is vital to alleviate and prevent maternal and neonatal  
29 disability and death.

30 **Objective:** The purpose of the study was to measure the levels of knowledge and attitude on  
31 preconception care and their determinants among women who delivered at government hospitals  
32 in a rural setting in southern Ethiopia.

33 **Method:** A facility-based cross sectional study was done from January 01 to February 30, 2017 on  
34 a sample of 370 women who delivered at government hospitals in Wolayita zone. The mothers were  
35 selected using systematic random sampling. The data were collected using structured and pretested  
36 interviewer administered questionnaires at the postnatal ward of each hospital. Data were analyzed  
37 using bivariate and multivariable techniques.

38 **Results:** The result showed that 53% (95% confidence interval [CI]: 47.8%, 58.1%) of mothers  
39 who delivered at public hospitals had adequate level of knowledge on preconception care,  
40 whereas 54.3% (95% CI: 49.2%, 59.5%) possessed positive attitude to preconception care.  
41 Mothers who have radio, planned pregnancy and have participated in community meetings  
42 related to preconception care had a meaningfully higher odds of good level of knowledge to  
43 preconception care. Ordinal regression showed that women who own mobile phone had at least  
44 three times significantly higher odds of positive attitude to preconception care, whereas women  
45 who have participated community meetings had lower odds of positive attitude on preconception  
46 care.

47 **Conclusion:** The results revealed that the levels of mothers' knowledge and positive attitude on  
48 preconception care are low relative to other studies. Using transistor radio and mobile phone  
49 have significant effect in improving the knowledge and attitude of reproductive age women on  
50 preconception care. Hence, providing community health education based on radio and/or mobile  
51 phone messaging could be useful in positively influencing the knowledge and attitude of women  
52 on preconception care.

53 **Key word:** knowledge, attitude, preconception care, determinant, radio, mobile phone, Ethiopia

54

## 55 **Background**

56 Preconception health care is a set of interventions prepregnancy to reduce the influence of  
57 biomedical, behavioral and social risks of mothers' health, and unborn child health (1). It can  
58 improve maternal and neonatal outcome by identifying, modifying bad habits and behaviors  
59 before conception and decreasing unintended pregnancies(2). Besides, most of pregnancy and  
60 childbirth complications can be alleviated by implementation of preconception care at health  
61 institution, meanwhile in low resource settings preconception care is not regularly implemented  
62 (3).

63 Though both governments and civil societies in developing countries frontline agenda is  
64 maternal and neonatal health service , newborn and child death and stillbirth, of which 77% are  
65 preventable by creating platform for essential packages at community, health center and hospital  
66 levels, have not yet been reduced to the expected level (4).

67 Worldwide 216 maternal deaths occurred per 100,000 live births in 2015, of which 99% occurred  
68 resource constraint areas, especially south Asia and sub-Saharan Africa. The most substantial  
69 cause of women mortality are: obstetric hemorrhage, preexisting medical conditions,  
70 hypertensive disease of pregnancy, infections /sepsis, unsafe abortion, and other indirect causes  
71 (4) . Globally, 2.6 million children died in the first month of life and neonatal mortality was  
72 estimated at 19 deaths per 1,000 live births(5). The under-five mortality in 2015 was 42.5 per  
73 1,000 live births (6, 7). In Ethiopia maternal mortality ratio is estimated at 412 per 100,000 live  
74 births in 2016, neonatal mortality at 29 deaths per 1000 live births, infant mortality at 48 deaths  
75 per 1,000 live births and the under-five mortality at 67 per 1000 live birth in 2016(8).

76 Reproductive planning through preconception care could be reduced 71% of unwanted  
77 pregnancies, thereby eliminating 22 million unplanned births, 25 million induced abortions and 7  
78 million miscarriages(9, 10). Similarly lack of preconception care and low folic acid  
79 supplementation for women in developing countries might increase the risk of neural tube defect  
80 in newborns by four time compared with developed countries (11).

81 The basic concept of preconception care is to advise child bearing age women away from any  
82 negative health behaviors or conditions that might affect a future pregnancy(12). "A reproductive

83 health plan reflects a person's intentions regarding the number and timing of pregnancies in the  
84 context of their personal values and life goals". This health plan will increase the number of  
85 planned pregnancies and encouraged persons to address risk behaviors before conception,  
86 reducing the risk of adverse outcomes for both the mother and unborn child(13, 14).

87 A study done in Kelantan, Malaysia found that 51.9% of women attending maternal health  
88 clinic had good level of knowledge on preconception care and 98.5% had positive attitude on  
89 preconception care(15). A study done in Egypt revealed that 39.2% of pregnant women  
90 attending ANC at Ain Shams University Hospital knew about the role of folic acid  
91 supplementation in prevention of congenital anomalies(16).A community based study done in  
92 Ethiopia had revealed that 27.5% of reproductive age women had good level of knowledge on  
93 preconception care(17).

94 Studies suggested antenatal care ought to initiate before pregnancy for a better pregnancy  
95 outcome. Implementation of preconception care in maternity care unit is crucial to achieve the  
96 sustainable development goal (SDG) targets in relation to maternal, neonatal and child health, by  
97 decision makers and stakeholders. However, evidence on the levels of knowledge and attitude on  
98 preconception care amongst women in rural African settings is scarce. The purpose of the study  
99 was therefore to measure the levels of knowledge and attitude on preconception care and their  
100 determinants among women who delivered at government hospitals in a rural setting in southern  
101 Ethiopia.

## 102 **Methods**

### 103 **Study design and setting**

104 A hospital-based cross sectional study was done from January 01to February 30, 2017 among  
105 mothers who delivered in public hospitals in Wolayita Zone and who were on immediate  
106 postnatal ward. Wolayita zone is found in the Southern Nations, Nationalities and Peoples  
107 Regional State of Ethiopia. According to the 2007 census of Ethiopia, the total population of the  
108 zone was 1.7 million. The public health institutions found in the zone were one referral hospital,  
109 four district hospitals and 70 health centers (5 urban and 65 rural). The total number of births

110 from the five hospitals in 2016 was 7445 (Otona Hospital 3511, Bonbe hospital 1228, Halale  
111 hospital 1142, Bitana Hospital 956, and Bale Hospital 608).

## 112 **Study population and sampling procedures**

113 Study populations were women who delivered at government hospitals in Wolayita zone during  
114 the study period. Mothers who were loss of consciousness, had mental problem, and referred to  
115 other hospitals were excluded.

116 Sample size was determined by using the software Epi Info version 7 with following  
117 assumptions: 95% confidence interval, an anticipated proportion of knowledge of preconception  
118 care of 10.4% based on a study in Nigeria(18), 4% of margin of error and a design effect of 1.5.  
119 The calculated sample size was 336. Added of 10% non-response rate, total sample was 374.

120 All public hospitals in Wolayita zone were included in the study and the sample size was  
121 proportionally allocated into five public hospitals based on number of deliveries each hospital.  
122 Systematic random sampling procedure was used to select study participants in each hospital.  
123 Monthly expected number of deliveries at public hospitals in Wolayita zone was 620; thus the  
124 sampling interval used was 2.

125 The questionnaires were prepared by reviewing the existing literatures. The questionnaire was  
126 prepared at English and then translated to Wolaytigna , and back to English to check uniformity.  
127 The questionnaire consisted of 57 items: 13 sociodemographic items, 6 obstetric items, 4 source  
128 of information items, 23 knowledge variables, and 11 attitude items. Attitude items level into  
129 five Likert scale (1-strongly disagree, 2-disagree, 3-neutral, 4-agree and 5- strongly agree).  
130 During analysis, the Likert scale items were categorized into three response categories to  
131 compute women's attitude on preconception care: disagree (by merging 1-strongly disagree and  
132 2-disagree), neutral and agree (by merging 4-agree and 5- strongly agree).

133 In Hawassa University Comprehensive Specialized Hospital pretest carried out 5% of study  
134 participant. Based on the pretest findings, amendment was done before initiation of actual data  
135 collection.

136 Data were collected using structured and pretested interviewer administered questionnaire  
137 through face -to -face by 10 midwives who had received training on basic emergency obstetrics

138 and newborn care (BEmONC) and who can fluently communicate with the local language  
139 (Wolaytigna). Training was given to data collectors for three days on data collection  
140 methodology and related issues prior to the start of data collection time and were closely  
141 supervised during the data collection period.

## 142 **Statistical analysis**

143 Data entry was done EPI Data 3.1 and transferred to SPSS version 20.0 for analysis. Based on  
144 23 knowledge items, we computed an overall knowledge score for each study participant.  
145 Those who had knowledge score above the mean knowledge score were level as “adequate  
146 knowledge” whereas at or below the mean knowledge score were categorized as “inadequate  
147 knowledge”. Eleven attitude items were recorded into disagree, neutral and agree. Those whose  
148 response was “agree” were considered as having “positive attitude” towards preconception  
149 care, whereas those whose response was “disagree” were regarded as having “negative attitude”  
150 towards preconception care; those with a “neutral” response were considered as having “neither  
151 negative nor positive attitude”. Descriptive analysis was done to calculate and describe the basic  
152 characteristics of the study participants knowledge and attitude to preconception care. Binary  
153 logistic regression was used to identify the correlates of knowledge on preconception care, while  
154 ordinal regression was used to identify correlates of attitude towards preconception care.  
155 Adjusted odds ratios (AORs) with 95% confidence intervals (CIs) were used to judge the  
156 presence and strength of association between dependent and independent variables. P value  
157 <0.05 was taken as statistically significant.

## 158 **Results**

### 159 **Socio-demographic characteristic of study participants**

160 Three hundred seventy women participated in this study and 99% of response rate. The  
161 participants’ age were amid from fifty to thirty eight with a mean age of 25 ( $\pm 4$ ) years. Wolayita  
162 was the dominant ethnic group (91.9%). Three hundred sixty three (98.1 %) were married. The  
163 majority (69.7%) of the participants were housewives and 34.9 % had completed primary school  
164 (Table 1).

165

166

167

168 Table 2: Socio-demographic characteristics of women who gave birth at government hospitals in  
 169 Wolayta Zone, South Ethiopia, February 2017

| Variables                   | (n=370)                    | Frequency | Percentage |
|-----------------------------|----------------------------|-----------|------------|
| Age                         | 15-19                      | 26        | 7          |
|                             | 20-24                      | 122       | 33         |
|                             | 25-29                      | 149       | 40.3       |
|                             | 30-34                      | 55        | 14.9       |
|                             | 35-38                      | 18        | 4.9        |
| Religion                    | Orthodox                   | 112       | 30.3       |
|                             | Muslim                     | 10        | 2.7        |
|                             | Protestant                 | 238       | 64.3       |
|                             | Catholic                   | 8         | 2.2        |
|                             | Jehovah witness            | 2         | 0.5        |
| Ethnicity                   | Wolayita                   | 340       | 91.9       |
|                             | Amara                      | 6         | 1.6        |
|                             | Oromo                      | 5         | 1.4        |
|                             | Gamo                       | 12        | 3.2        |
|                             | Others®                    | 7         | 1.9        |
| Marital status              | Married                    | 363       | 98.1       |
|                             | Single                     | 5         | 1.4        |
|                             | Widowed                    | 2         | 0.5        |
| Occupation of<br>The mother | House wife                 | 258       | 69.7       |
|                             | Government employed        | 34        | 9.2        |
|                             | Private employed           | 13        | 3.5        |
|                             | Merchant                   | 54        | 14.6       |
|                             | Daily labor                | 7         | 1.9        |
| Occupation of spouse        | Farmer                     | 4         | 1.1        |
|                             | Farmer                     | 123       | 33.2       |
|                             | Government employed        | 80        | 21.6       |
|                             | Private employed           | 45        | 12.2       |
|                             | Daily labor                | 14        | 3.8        |
| Residency                   | Merchant                   | 103       | 27.8       |
|                             | Other                      | 5         | 1.4        |
|                             | Urban                      | 162       | 43.8       |
| Monthly income              | Rural                      | 208       | 56.2       |
|                             | <1313Ethiobirr(< 59.7USD ) | 198       | 53.5       |

|                                              |                                                          |     |      |
|----------------------------------------------|----------------------------------------------------------|-----|------|
|                                              | <1313Ethiobirr(< 59.7USD )                               | 172 | 46.5 |
| <b>Family size</b>                           | 1-2                                                      | 63  | 12.4 |
|                                              | 3-5                                                      | 369 | 72.4 |
|                                              | 6-9                                                      | 78  | 15.3 |
| <b>Educational status of woman</b>           | Non formal education                                     | 110 | 29.7 |
|                                              | Primary school complete                                  | 151 | 40.8 |
|                                              | Secondary school and above                               | 109 | 29.5 |
| <b>Educational status of spouse</b>          | Non formal education                                     | 53  | 14.3 |
|                                              | Primary school complete                                  | 129 | 43   |
|                                              | Secondary school and above                               | 158 | 42.7 |
| <b>Communication</b>                         | Have radio                                               | 248 | 67   |
|                                              | Have Television                                          | 100 | 27   |
|                                              | Have Mobile                                              | 202 | 54.6 |
|                                              | Have health care providers relative                      | 136 | 36.8 |
|                                              | Have regular community meeting regarding maternal health | 89  | 24.1 |
|                                              | Have meeting with health extension worker                | 181 | 48.9 |
|                                              | Have health care providers friend                        | 109 | 29.5 |
| <b>Time to take reach health institution</b> | <30minute                                                | 205 | 55.4 |
|                                              | >30minute                                                | 165 | 44.6 |

170 Others<sup>®</sup>-Dawro, Hadya, Sltie, Gurage

171 \*1 USD was 22 Ethiopian birr

172 Income under extreme poverty <1.25USD per day

173

## 174 **Obstetric characteristics of study participants**

175 In two hundred ninety six (80%) of the mothers, the recent pregnancy was planned. Nearly two-  
 176 third (65.1%) of mothers had used family planning before the current pregnancy. Ninety eight  
 177 (26.5%) of the mothers were primigravidae and 272(73.5%) were multigravidae, whereas



178 110(29.7%) were primipara and 260(70.3%) were multipara. Two hundred eighty three (76.5%)  
 179 of the participants had antenatal contact for this pregnancy, of whom 152(41.1%) had four or  
 180 more ANC contacts (Table3).

181 Table 4: Obstetric history of women who delivered at government hospitals in Wolayita Zone,  
 182 South Ethiopia, February 2017

183

| Variables                        | (N=370)        | Frequency | Percentage (%) |
|----------------------------------|----------------|-----------|----------------|
| Have family planning use history | Yes            | 241       | 65.1           |
|                                  | No             | 129       | 34.9           |
| Gravida                          | Prim gravida   | 98        | 26.5           |
|                                  | Multigravida   | 272       | 73.5           |
| Parity                           | Primipara      | 110       | 29.7           |
|                                  | Multipara      | 260       | 70.3           |
| Is pregnancy plan                | Yes            | 296       | 80             |
|                                  | No             | 74        | 20             |
| ANC follow up                    | Yes            | 283       | 76.5           |
|                                  | No             | 87        | 23.5           |
| Number of ANC visit              | No visit       | 20        | 5.4            |
|                                  | 1              | 9         | 2.4            |
|                                  | 2              | 44        | 11.9           |
|                                  | 3              | 130       | 35.1           |
|                                  | 4              | 152       | 41.1           |
|                                  | More than four | 15        | 4.1            |

184

### 185 Level of mothers' knowledge on preconception care

186 The lowest and highest knowledge scores of the mothers were zero to twenty three. One hundred  
 187 ninety six (53%) (95% CI: 47.8%, 58.1%) of women had adequate level of knowledge to  
 188 preconception care (Table 5). The main source of information were health institutions (33%) and  
 189 friends (26.5%) (Figure 1).

190 Table 6: Women's knowledge on preconception care who delivered at government hospitals in  
 191 Wolayita Zone, South Ethiopia, February 2017

| Variable                                    | ( N= 370) | Frequency | Percent |      |
|---------------------------------------------|-----------|-----------|---------|------|
| Avoid bad habits when planned to pregnancy  |           | Yes       | 311     | 84.1 |
|                                             |           | No        | 59      | 15.9 |
| Adjust their life when planned to pregnancy |           | Yes       | 324     | 87.6 |

|                                                                                 |     |     |      |
|---------------------------------------------------------------------------------|-----|-----|------|
|                                                                                 | No  | 46  | 12.4 |
| Avoid smoking when planned to pregnancy                                         | Yes | 281 | 75.9 |
|                                                                                 | No  | 89  | 24.1 |
| Avoid drinking alcohol when planned to pregnancy                                | Yes | 291 | 78.6 |
|                                                                                 | No  | 79  | 21.4 |
| Avoid multiple sexual partners when planned to pregnancy                        | Yes | 303 | 81.9 |
|                                                                                 | No  | 67  | 18.1 |
| Test HIV/AIDS when planned to pregnancy                                         | Yes | 302 | 81.6 |
|                                                                                 | No  | 68  | 18.4 |
| Take folic acid and multivitamins to prevent neural tube defects                | Yes | 210 | 56.8 |
|                                                                                 | No  | 160 | 43.2 |
| Take iron sulfate to prevent anemia?                                            | Yes | 293 | 79.2 |
|                                                                                 | No  | 77  | 20.8 |
| Avoid illicit drugs when planned to pregnancy                                   | Yes | 262 | 70.8 |
|                                                                                 | No  | 108 | 29.2 |
| Stop over exercising when planned to pregnancy                                  | Yes | 287 | 77.6 |
|                                                                                 | No  | 83  | 22.4 |
| Stop caffeine drinking when planned to pregnancy                                | Yes | 110 | 29.7 |
|                                                                                 | No  | 260 | 70.3 |
| Stop mercury from consumption of seafood when planned to pregnancy              | Yes | 99  | 25.9 |
|                                                                                 | No  | 274 | 74.1 |
| Away from Pesticides/insecticides chemicals when planned to pregnancy           | Yes | 217 | 58.6 |
|                                                                                 | No  | 153 | 41.4 |
| Away from contact with substances like lead in paints when planned to pregnancy | Yes | 102 | 27.6 |
|                                                                                 | No  | 268 | 72.4 |
| Away from exposure to occupational hazards when planned to pregnancy            | Yes | 281 | 75.9 |
|                                                                                 | No  | 89  | 24.1 |
| Maintain body weight when planned to pregnancy                                  | Yes | 241 | 65.1 |
|                                                                                 | No  | 129 | 34.9 |
| Take balance diet when planned to pregnancy                                     | Yes | 266 | 71.9 |
|                                                                                 | No  | 104 | 28.1 |
| Check STI when planned to pregnancy                                             | Yes | 301 | 81.4 |
|                                                                                 | No  | 69  | 18.6 |
| Take ordinary multivitamins when planned to pregnancy                           | Yes | 257 | 69.5 |
|                                                                                 | No  | 113 | 30.5 |
| Take ordinary vitamin D when planned to pregnancy                               | Yes | 112 | 30.3 |
|                                                                                 | No  | 258 | 69.7 |
| Take omega 3 vitamins when planned to pregnancy                                 | Yes | 18  | 4.9  |
|                                                                                 | No  | 352 | 95.1 |
| Take ordinary zinc when planned to pregnancy                                    | Yes | 18  | 4.9  |
|                                                                                 | No  | 352 | 95.1 |
| Street drugs when planned to pregnancy                                          | Yes | 242 | 65.4 |
|                                                                                 | No  | 128 | 34.6 |

192

193

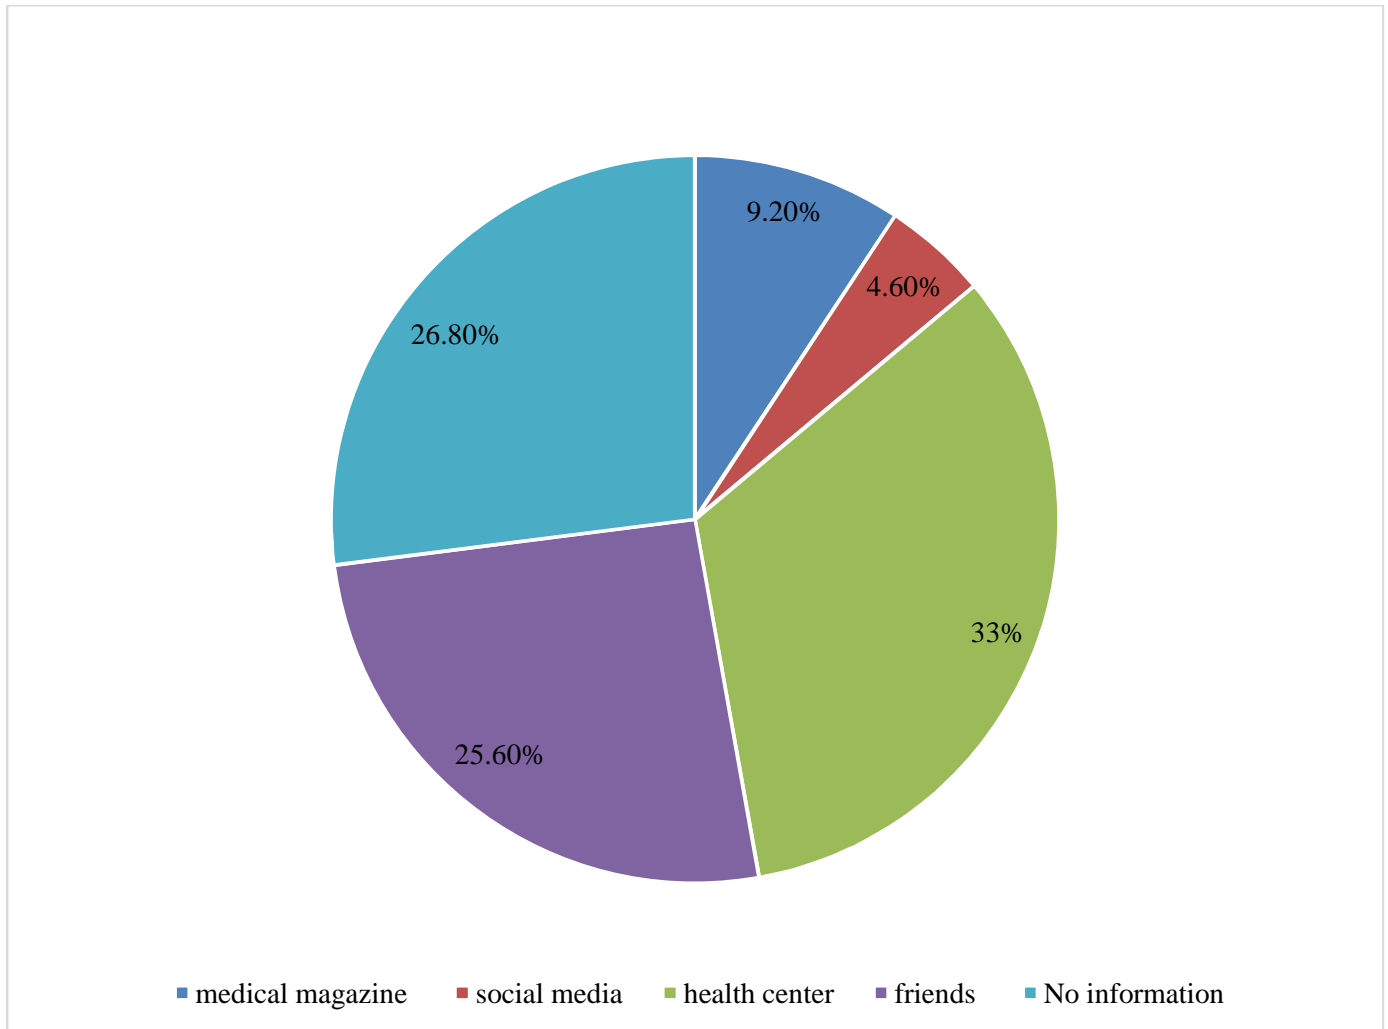

194

195

196 Figure 2: Source of information regarding preconception care amongst women who delivered at  
197 government hospitals in Wolayita Zone, South Ethiopia, February 2017.

198

### 199 **Women's attitude on preconception care**

200 Among the total of 370 respondents, 300(81.1%) of the mothers agreed that a hospital setting is  
201 the best place to provide preconception care and 277(74.9%) of women also agreed that  
202 preconception care is an important health issue for child bearing age women. Besides, 54(14.6%)  
203 of women agreed that there is not enough time to plan to get a preconception care. Overall, 201  
204 (54.3%) (95%CI: 49.2%, 59.5%) of mothers had positive attitude towards preconception care,

205 23(6.2%) (95%CI: 4.1%, 8.9%) of mothers had neither positive nor negative (neutral) attitude  
 206 towards preconception care and 146 (39.5%) (95%CI: 34.6%, 44.6%) of mothers had negative  
 207 attitude towards preconception care (Table 7).

208 Table 8: Women’s attitude on preconception care who delivered at government hospitals in  
 209 Wolayita Zone, South Ethiopia, February 2017

| Parameter (N= 370)                                                                     | SA&A |      | Neutral |      | SD&D |      |
|----------------------------------------------------------------------------------------|------|------|---------|------|------|------|
|                                                                                        | N    | %    | N       | %    | N    | %    |
| Preconception care does not have any effect on pregnancy outcome                       | 160  | 43.2 | 53      | 14.3 | 157  | 42.4 |
| Preconception care is an important health issue for women of child bearing age         | 277  | 74.9 | 57      | 15.4 | 36   | 9.7  |
| A dedicated clinic for preconception care is a luxury service                          | 209  | 56.5 | 56      | 15.1 | 105  | 28.4 |
| A hospital setting is the best place to provide preconception care                     | 300  | 81.1 | 33      | 8.9  | 37   | 10   |
| Preconception care is a high priority all mother to plan pregnancy                     | 241  | 65.1 | 74      | 20   | 55   | 14.9 |
| I am not the most suitable person plan to get preconception care                       | 69   | 18.6 | 40      | 10.8 | 261  | 70.5 |
| There is not enough time to plan to get a preconception care                           | 54   | 14.6 | 43      | 11.6 | 273  | 73.8 |
| Health institutions exercise preconception care                                        | 96   | 25.9 | 41      | 11.1 | 233  | 63   |
| Do you think high-risk mothers only start preconception care when planned to pregnancy | 106  | 28.6 | 28      | 7.6  | 236  | 63.8 |
| History congenital anomalies only use preconception care                               | 113  | 30.5 | 33      | 8.9  | 224  | 60.5 |
| Preconception care depends on health care providers willingness                        | 262  | 70.8 | 46      | 12.4 | 62   | 16.8 |

210 SA: Strongly agree, A: agree, SD: strongly disagree and D: disagree

211

212 **Determinants of knowledge and attitude on preconception care**

213 Study participants who had radio (AOR: 2.91; 95% CI: 1.69, 5.43), planned pregnancy  
 214 counterpart (AOR: 5.76; 95% CI: 2.84, 11.67), and had participated in community meetings  
 215 related to preconception care (AOR: 2.96; 95% CI: 1.62, 5.43) had significantly higher odds of  
 216 good level of knowledge on preconception care (Table 9).

217 Table 10: Determinants of knowledge on preconception care amongst women who delivered at  
 218 government hospitals in Wolayita Zone, South Ethiopia, February 2017

| Variable                                                           | knowledgeable(N=196) | Non knowledgeable (N=174) | COR 95 % CI          | AOR 95 % CI         |
|--------------------------------------------------------------------|----------------------|---------------------------|----------------------|---------------------|
| <b>Do you have radio</b>                                           |                      |                           |                      |                     |
| Yes                                                                | 159 (43)             | 89(24.1)                  | 4.10(2.58,6.54) *    | 2.91(1.69,5.43) *   |
| No                                                                 | 37(10)               | 85(23.4)                  | 1                    | 1                   |
| <b>Do have health care providers' relatives</b>                    |                      |                           |                      |                     |
| Yes                                                                | 88(23.8)             | 48(13)                    | 2.13(1.384,3.306)*   | 1.29(0.74,2.26)     |
| No                                                                 | 108(29.2)            | 126(34.1)                 | 1                    |                     |
| <b>Is pregnancy planned</b>                                        |                      |                           |                      |                     |
| Yes                                                                | 183(49.5)            | 113(30.5)                 | 7.60(3.995,14.455)*  | 5.76(2.84, 11.67) * |
| No                                                                 | 13(3.5)              | 61(16.5)                  | 1                    | 1                   |
| <b>do you have community meeting related to preconception care</b> |                      |                           |                      |                     |
| Yes                                                                | 67(18.1)             | 22(5.9)                   | 3.588(2.100,6.132) * | 2.96(1.62, 5.43) *  |
| No                                                                 | 129(34.9)            | 152(41.1)                 | 1                    | 1                   |
| <b>Do you have health care</b>                                     |                      |                           |                      |                     |

| providers friends            |           |           |                      |                 |
|------------------------------|-----------|-----------|----------------------|-----------------|
| Yes                          | 75(20.3)  | 34(9.2)   | 2.552(1.591,4.094) * | 1.36(0.74,2.47) |
| No                           | 127(34.3) | 140(37.8) | 1                    |                 |
| Educational status of spouse |           |           |                      |                 |
| Non formal education         | 14(3.8)   | 39(10.5)  | 0.301(0.151,0.597)   |                 |
| Primary school               | 96(25.9)  | 63(17)    | 1.28(0.817,1.993) *  | 1.31(0.73,2.36) |
| Secondary and above          | 86(23.2)  | 72(19.5)  | 1                    | 1               |

219

220 \* P<0.05

221 On other hand, multivariable ordinal regression showed that women who had mobile phone had  
 222 2 times higher chances of positive attitude(AOR: 2.17, 95 % CI: 1.31, 3.59) and those who had  
 223 participated in community meetings related to preconception care had decreased odds of positive  
 224 attitude towards preconception care (AOR: 0.36, 95 % CI: 0.22, 0.60) (table 11).

225 Table 12: Determinants of attitude to preconception care amongst women who delivered at  
 226 government hospitals in Wolayita Zone, South Ethiopia, February 2017

| Variable                                                 | Attitude        |               |                   | COR 95 % CI | AOR 95 % CI       |
|----------------------------------------------------------|-----------------|---------------|-------------------|-------------|-------------------|
|                                                          | Disagree(N=146) | Neutral(N=23) | Agree(N=201)      |             |                   |
| Residency                                                | Rural           |               | 1.94(1.29,2.93) * |             | 1.49(0.91,2.44)   |
|                                                          | Urban           |               | 1                 |             | 1                 |
| Mobile phone                                             | Yes             |               | 2.29(1.52,3.44) * |             | 2.17(1.31,3.59) * |
|                                                          | No              |               | 1                 |             | 1                 |
| Do you have community meeting related to maternal health | Yes             |               | 0.35(0.22,0.57) * |             | 0.36(0.22,0.60) * |
|                                                          | No              |               | 1                 |             | 1                 |

|                  |                            |                   |                 |
|------------------|----------------------------|-------------------|-----------------|
| Spouse education | Non formal education       | 0.58(0.38,0.90)*  | 1.32(0.63,2.76) |
|                  | Primary school complete    | 0.82(0.44,1.52) * | 0.8(0.48,1.34)  |
|                  | Secondary school and above | 1                 | 1               |

227 \* P<0.05

## 228 **Discussion**

229 Findings revealed that level of knowledge on preconception care amongst women who delivered  
 230 at government hospitals in Wolayita Zone is 53%. This finding is inconsistent with the findings  
 231 in Northwest Ethiopia (27.5%) (17), Sudan (11.1%) (19), Nigeria (2.5%)(9), Iran (10.4%)(20),  
 232 Saudi Arabia (37.9%) (21), United Arab Emirates (46.4%) (22), and Turkey (46.3%) (23). The  
 233 possible explanation for higher level of knowledge in the present study could be the time of  
 234 study currently, maternal health is given high attention which may result in an overall increase in  
 235 knowledge of issues related to maternal health. Contextual differences in the study settings could  
 236 also account for the observed differences.

237 On the other hand, it is consistent with studies done in Malaysia (51.9%)(15), and in Qatar  
 238 (53.7 %)(24). However, this finding is lower than the study done in Canada (70%)(25), Jordan  
 239 (85%)(26), British Colombia (71%) (27), Saudi Arabia (84.6%)(28), and in the United States of  
 240 America (76%) (29). The possible explanation could be low level of knowledge due to health  
 241 sector infrastructure difference, socioeconomic difference, lack of health wellness clinic in the  
 242 area of the present study, lack of preconception service across Ethiopia, lack of promotion on  
 243 preconception care by mass media, and low commitment of health care providers due to high  
 244 load of clients.

245 In this study the correlates of knowledge on preconception care were found to be possession of  
 246 transistor radio, planned pregnancy, and having participated in community meetings related to  
 247 preconception care. Women who had radio had three times higher likelihoods to have adequate  
 248 knowledge on preconception care. It is inconsistent with studies done in Ethiopia and  
 249 Nigeria(9, 17). The higher level of knowledge of preconception care amongst women who  
 250 possess transistor radio and who participate in community meetings related to preconception care

251 can be due to exposure of such mothers for health information via radio and also during  
252 community meetings. The community meetings could also create a platform for women to share  
253 their positive and negative childbirth experience and prevention mechanisms. Similarly, women  
254 who planned the recent pregnancy had six times higher chances to have adequate knowledge on  
255 preconception care which is coincided with the finding in Brazil(30). The possible explanation  
256 could be reproductive age women who planned pregnancy are anticipated to know their  
257 healthiness correlated to maternal health care and may thus have also a better awareness of issues  
258 correlated to preconception care.

259 In this study 54.3% of mothers were found to have positive attitude on preconception care. This  
260 finding is incomparable with studies done Malaysia (98.5%)(15)and USA (98%) (29).The  
261 difference might be due availability and accessibility of the service in settings with better  
262 socioeconomic status such as in Kelantan, Malaysia and USA.

263 Women who possess mobile cell phones have more than twice increased odds of positive attitude  
264 towards preconception care; however, women who have participated in community meetings  
265 related to preconception care had decreased odds of positive attitude towards preconception care.  
266 The reason why women who possess cell phone have a higher odds of positive attitude towards  
267 perception care could be due to better exposure of such women to health information via  
268 frequency modulated (FM) radio services which are available in most cell phones and for some  
269 of the literate mothers via mobile internet. Women who possess mobile phone may also generally  
270 be in a better socioeconomic position and hence may have more positive attitudes to health care  
271 services. Why women who participate in community meetings have a decreased odds of positive  
272 attitude is difficult to explain, but could be a result of being fed up with regular participation in  
273 community meetings.

274 The strength of this study relative to previous studies is incorporating relevant variables which  
275 were not addressed previously such as having planned pregnancy, possession of transistor radio  
276 and participating in community meetings related to preconception care. The limitation of this  
277 study is point out that it did not incorporate both sides like partners of women. Outcomes can be  
278 some amount affected by recall and social desirability biases.



## 279 Conclusion

280 Levels of women's knowledge and positive attitude on preconception care among women who  
281 delivered at government hospitals in rural southern Ethiopia is low compared with other studies.  
282 Using transistor radio and mobile phone have significant effects in improving the knowledge and  
283 attitude of reproductive age women on preconception care. Hence, providing community health  
284 education based on radio and/or mobile phone messaging could be useful in positively  
285 influencing the knowledge and attitude of women on preconception care.

## 286 Declarations

## 287 Abbreviation

288 AOR- Adjusted Odds Ratio

289 BEmONC- basic emergency obstetrics and newborn care

290 CI – confidence interval

291 SDG – Sustainable Development Goals

292 SPSS – Statistical Package for Social Sciences

293 USA – United States of America

## 294 Acknowledgement

295 We would like to acknowledge the Centre of Excellence in Maternal and Newborn Health SRH3  
296 project at the College of Medicine and Health Sciences of Hawassa University for technical and  
297 financial support. We extend to acknowledge study participants, Wolayta Zone Health office  
298 and Wolayta Zone public hospital officials for their support and permission to carry out the  
299 study.

## 300 Authors' contribution

301 ZY originated of the idea and planned to the study, participating during data collection, analysis  
302 the data and write up the manuscript. ZT, AA, MS, GB, KT, SM and ZK are reviewed the study

303 procedure, participated in data acquisition and analysis and reviewed the manuscript. All authors  
304 read and approved the final manuscript.

### 305 **Disclosure statement**

306 The authors declare there is no competing interests.

### 307 **Ethics and consent**

308 Ethical clearance was gained from the Institutional Review Board at the College of Medicine and  
309 Health Sciences of Hawassa University. Wolayita Zone Health office and management of the  
310 respective public hospitals gave consent to conduct the study. Written consent was obtained from  
311 the study participants before data collection started. Anonymous questionnaire was used to  
312 assure confidentiality of study participants.

### 313 **Fund**

314 This study sponsored by Hawassa University, Centre of Excellence in Maternal and Newborn  
315 Health. The funders had no role in the study design, data collection, data analysis, data  
316 interpretation, or writing of the report. The authors had access to the data in the study and the  
317 final responsibility to submit the paper.

318 Consent for publication:

319 Not applicable.

### 320 **Availability of data and materials**

321 All data on which this article is based are included within the article.

### 322 **Authors' information**

323 **1. Zemenu Yohannes:** School of Nursing and Midwifery, College of Medicine and health  
324 sciences, Hawassa University, Ethiopia

325 **2. Zelalem Tenaw:** School of Nursing and Midwifery, College of Medicine and health sciences,  
326 Hawassa University, Ethiopia

327 **3. Ayalew Astatkie:** School of Public Health, College of Medicine and health sciences, Hawassa  
328 University, Ethiopia

329 **4. Melesse Seyoum:** School of Nursing and Midwifery, College of Medicine and health  
330 sciences, Hawassa University, Ethiopia

331 **5. Gezahegn Bekele:** School of Nursing and Midwifery, College of Medicine and health  
332 sciences, Hawassa University, Ethiopia

333 **6. Kefyalew Taye:** School of Medicine, College of Medicine and health sciences, Hawassa  
334 University, Ethiopia

335 **7. Sewangizaw Mekonnen:** School of Nursing and Midwifery, College of Medicine and health  
336 sciences, Hawassa University, Ethiopia

337 **8. Zerai Kahsaye:** School of Medicine, College of Medicine and health sciences, Hawassa  
338 University, Ethiopia

### 339 **References**

340 1. Fransen MP, Hopman ME, Murugesu L, Rosman AN, Smith SK. Preconception counselling  
341 for low health literate women: an exploration of determinants in the Netherlands. *Reproductive*  
342 *health*. 2018;15(1):192.

343 2. Joanne Simone et al. Models of HIV Preconception Care and Key Elements Influencing These  
344 Services: Findings from Healthcare Providers in Seven US Cities *AIDS PATIENT CARE and*  
345 *STDs*. 2018;32(7).

346 3. Wahabi HA, Alzeidan RA, Bawazeer GA, Alansari LA, Esmail SA. Preconception care for  
347 diabetic women for improving maternal and fetal outcomes: a systematic review and meta-  
348 analysis. *BMC pregnancy and childbirth*. 2010;10(1):63.

349 4. Black RE, Levin C, Walker N, Chou D, Liu L, Temmerman M, et al. Reproductive, maternal,  
350 newborn, and child health: key messages from Disease Control Priorities 3rd Edition. *The*  
351 *Lancet*. 2016;388(10061):2811-24.

352 5. Black RE, Walker N, Laxminarayan R, Temmerman M. Reproductive, maternal, newborn,  
353 and child health: key messages of this volume. *Reproductive, Maternal, Newborn, and Child*  
354 *Health*. 2016:1.

- 355 6. Alkema L, Chou D, Hogan D, Zhang S, Moller A-B, Gemmill A, et al. Global, regional, and  
356 national levels and trends in maternal mortality between 1990 and 2015, with scenario-based  
357 projections to 2030: a systematic analysis by the UN Maternal Mortality Estimation Inter-  
358 Agency Group. *The Lancet*. 2016;387(10017):462-74.
- 359 7. You D, Hug L, Ejdemyr S, Idele P, Hogan D, Mathers C, et al. Global, regional, and national  
360 levels and trends in under-5 mortality between 1990 and 2015, with scenario-based projections to  
361 2030: a systematic analysis by the UN Inter-agency Group for Child Mortality Estimation. *The*  
362 *Lancet*. 2015;386(10010):2275-86.
- 363 8. EDHS E. demographic and health survey 2016: key indicators report. The DHS Program ICF.  
364 2016.
- 365 9. Lawal TA, Adeleye AO. Determinants of folic acid intake during preconception and in early  
366 pregnancy by mothers in Ibadan, Nigeria. *The Pan African Medical Journal*. 2014;19.
- 367 10. Sh S AP, Izadi M,. Effect of preconception care protocol implementation on women's  
368 awareness. *Iranian Journal of Education in Medical science*. 2007;2007:525-32.
- 369 11. Cherian A, Seena S, Bullock RK, Antony AC. Incidence of neural tube defects in the least-  
370 developed area of India: a population-based study. *The Lancet*. 2005;366(9489):930-1.
- 371 12. Waggoner MR. Motherhood preconceived: The emergence of the preconception health and  
372 health care initiative. *Journal of Health Politics, Policy and Law*. 2013;38(2):345-71.
- 373 13. Johnson K, Posner SF, Biermann J, Cordero JF, Atrash HK, Parker CS, et al.  
374 Recommendations to Improve Preconception Health and Health Care—United States: Report of  
375 the CDC/ATSDR Preconception Care Work Group and the Select Panel on Preconception Care.  
376 *Morbidity and Mortality Weekly Report: Recommendations and Reports*. 2006;55(6):1-CE-4.
- 377 14. Corbett E. Preconception health and wellness: Knowledge and attitudes of undergraduate  
378 women: Colorado State University; 2011.
- 379 15. Kasim R, Draman N, Kadir AA, Muhamad R. Knowledge, attitudes and practice of  
380 preconception care among women attending maternal health clinic in Kelantan. *Education in*  
381 *Medicine Journal*. 2016;8(4).
- 382 16. Al-Darzi W, Al-Mudares F, Farah A, Ali A, Marzouk D. Knowledge of periconceptional  
383 folic acid use among pregnant women at Ain Shams University Hospital, Cairo, Egypt/[TEXT  
384 NOT REPRODUCIBLE IN ASCII]/Connaissances sur l'utilisation periconceptionnelle de l'acide

- 385 folique chez des femmes enceintes a l'hopital universitaire Ain Shams, au Caire (Egypte).  
386 Eastern Mediterranean Health Journal. 2014;20(9):561-9.
- 387 17. Ayalew Y, Mulat A, Dile M, Simegn A. Women's knowledge and associated factors in  
388 preconception care in adet, west gojjam, northwest Ethiopia: a community based cross sectional  
389 study. Reproductive health. 2017;14(1):15.
- 390 18. Olayinka OA, Achi OT, Amos AO, Chiedu EM. Awareness and barriers to utilization of  
391 maternal health care services among reproductive women in Amassoma community, Bayelsa  
392 State. International Journal of nursing and midwifery. 2014;6(1):10-5.
- 393 19. Ahmed K, Saeed A, Alawad A. Knowledge, attitude and practice of preconception care  
394 among Sudanese women in reproductive age about rheumatic heart disease. Int J Public Health.  
395 2015;3(5):223-7.
- 396 20. Ghaffari F, Jahani Shourab N, Jafarnejad F, Esmaily H. Application of Donabedian quality-  
397 of-care framework to assess the outcomes of preconception care in urban health centers,  
398 Mashhad, Iran in 2012. Journal of Midwifery and Reproductive Health. 2014;2(1):50-9.
- 399 21. Madanat AY, Sheshah EA. Preconception care in Saudi women with diabetes mellitus.  
400 Journal of family & community medicine. 2016;23(2):109.
- 401 22. Abdulrazzaq YM, Al-Gazali LI, Bener A, Hossein M, Verghese M, Dawodu A, et al. Folic  
402 acid awareness and intake survey in the United Arab Emirates. Reproductive Toxicology.  
403 2003;17(2):171-6.
- 404 23. Baykan Z, Öztürk A, Poyrazoğlu S, Gün İ. Awareness, knowledge, and use of folic acid  
405 among women: a study from Turkey. Archives of gynecology and obstetrics. 2011;283(6):1249-  
406 53.
- 407 24. Bener A, Al Maadid MG, Al-Bast DA, Al-Marri S. Maternal knowledge, attitude and  
408 practice on folic acid intake among Arabian Qatari women. Reproductive toxicology.  
409 2006;21(1):21-5.
- 410 25. Einarson A, Koren G. A survey of women's attitudes concerning healthy lifestyle changes  
411 prior to pregnancy. JFAS Int. 2006;4:e2.
- 412 26. Al-Akour N, Sou'Ub R, Mohammad K, Zayed F. Awareness of preconception care among  
413 women and men: a study from Jordan. Journal of Obstetrics and Gynaecology. 2015;35(3):246-  
414 50.

- 415 27. Morin VI, Mondor M, Wilson RD. Knowledge on Periconceptional Use of Folic Aid in  
416 Women of British Columbia. *Obstetrical & Gynecological Survey*. 2001;56(8):455-6.
- 417 28. Gautan P, Dhakal R. Knowledge on preconception care among reproductive age women.  
418 *Saudi J Med Pharm Sci*. 2016;2(1):6.
- 419 29. Coonrod DV, Bruce NC, Malcolm TD, Drachman D, Frey KA. Knowledge and attitudes  
420 regarding preconception care in a predominantly low-income Mexican American population.  
421 *American journal of obstetrics and gynecology*. 2009;200(6):686. e1-. e7.
- 422 30. Borges ALV, Santos OAd, Nascimento NdC, Chofakian CBdN, Gomes-Sponholz FA.  
423 Preconception health behaviors associated with pregnancy planning status among Brazilian  
424 women. *Revista da Escola de Enfermagem da USP*. 2016;50(2):208-16.

425
